# 1 **A memory of recent oxygen experience switches** 2 **pheromone valence in *C. elegans***

3  
4 Lorenz A. Fenk<sup>1</sup> and Mario de Bono<sup>1</sup>.

5 <sup>1</sup>MRC Laboratory of Molecular Biology, Francis Crick Avenue, Cambridge, CB2 0QH,  
6 United Kingdom.

7  
8  
9  
10  
11 Corresponding author

12 Dr Mario de Bono

13 Tel +44-1223-267034

14 email: [debono@mrc-lmb.cam.ac.uk](mailto:debono@mrc-lmb.cam.ac.uk)

15  
16 Short title: A memory switch of pheromone valence in *C. elegans*

17  
18 Classification:

19 Major category - Biological Sciences

20 Minor category – Neuroscience; Genetics

21  
22 Key words: neural circuit; experience-dependent plasticity; tonic circuit; acclimation;  
23 neural imaging; behavioral choice; hub-and-spoke network; *Caenorhabditis*; nematode;  
24 ascarosides; carbon dioxide;

28 **ABSTRACT**

29 **Animals adjust their behavioral priorities according to momentary needs and**  
30 **prior experience. We show that *C. elegans* changes how it processes sensory**  
31 **information according to the oxygen environment it experienced recently. *C.***  
32 ***elegans* acclimated to 7% O<sub>2</sub> are aroused by CO<sub>2</sub> and repelled by pheromones**  
33 **that attract animals acclimated to 21% O<sub>2</sub>. This behavioral plasticity arises from**  
34 **prolonged activity differences in a circuit that continuously signals O<sub>2</sub> levels. A**  
35 **sustained change in the activity of O<sub>2</sub> sensing neurons reprograms the**  
36 **properties of their post-synaptic partners, the RMG hub interneurons. RMG is**  
37 **gap-junctionally coupled to the ASK and ADL pheromone sensors that**  
38 **respectively drive pheromone attraction and repulsion. Prior O<sub>2</sub> experience has**  
39 **opposite effects on the pheromone responsiveness of these neurons. These**  
40 **circuit changes provide a physiological correlate of altered pheromone valence.**  
41 **Our results suggest *C. elegans* stores a memory of recent O<sub>2</sub> experience in the**  
42 **RMG circuit and illustrate how a circuit is flexibly sculpted to guide behavioral**  
43 **decisions in a context-dependent manner.**

44

45 **SIGNIFICANCE STATEMENT**

46 Animals use memories of their recent environment to regulate their behavioral  
47 priorities. The basis for this cross-modal, experience-dependent plasticity is poorly  
48 understood. *C. elegans* feeds on bacteria in rotting fruit. It monitors O<sub>2</sub> levels, and  
49 switches behavioral state when O<sub>2</sub> approaches 21%. We show that *C. elegans*'  
50 memory of its recent O<sub>2</sub> environment reconfigures how it processes sensory  
51 information. Pheromones that attract animals acclimated to 21% O<sub>2</sub> repel animals  
52 acclimated to 7% O<sub>2</sub>. O<sub>2</sub> memory is encoded in the activity history of a circuit that  
53 continuously signals O<sub>2</sub> levels. This circuit is connected to neurons driving pheromone  
54 attraction and repulsion. O<sub>2</sub> experience changes the pheromone responsiveness of

55 these sensors and their post-synaptic targets, correlating with the switch in pheromone  
56 valence.

57

## 58 **INTRODUCTION**

59 The body comprises multiple highly integrated subsystems working together to sustain  
60 life from moment-to-moment and over long time scales (1). Much of this coordination  
61 involves dynamically interacting neural circuits that optimize responses to current  
62 circumstances by taking into account sensory input, organismal state, and previous  
63 experience (2–8). Circuit crosstalk enables animals to adjust their behavioral priorities  
64 in response to a changing environment e.g. variation in temperature, humidity, day  
65 length, or oxygen (O<sub>2</sub>) levels (9–13). While some behavioral adjustments can be rapid  
66 (14, 15), others develop over time, as animals adapt to changed conditions. How  
67 animals store information about their recent environment, and use this information to  
68 modify behavioral choices is poorly understood.

69       The compact nervous system of *Caenorhabditis elegans*, which comprises only  
70 302 uniquely identifiable neurons (wormwiring.org) (16), provides an opportunity to  
71 study the links between prior environmental experience, circuit plasticity, and  
72 behavioral change. This nematode is adapted to a life feeding on bacteria in rotting fruit  
73 (17, 18). It has sensory receptors for odors, tastants, pheromones, and respiratory  
74 gases, as well as temperature, mechanical, and noxious cues (19–22). Despite this  
75 simplicity, the mechanisms by which its nervous system marshals information about  
76 past and present sensory experience to shape behavioral priorities have largely not  
77 been dissected. While valuable (23), the anatomical connectome is insufficient to  
78 explain or predict neuronal network function (24, 25), partly because neuromodulators  
79 can dynamically reconfigure and specify functional circuits (26–28).

80           When ambient O<sub>2</sub> approaches 21% *C. elegans* wild isolates become  
81 persistently aroused and burrow to escape the surface (29–31). This state switch is  
82 driven by tonically signalling O<sub>2</sub> receptors called URX, AQR and PQR (32, 33) whose  
83 activity increases sharply when O<sub>2</sub> approaches 21% (29, 31, 34, 35). The URX neurons  
84 are connected by gap junctions and reciprocal synapses to the RMG interneurons, and  
85 tonically stimulate RMG to promote escape from 21% O<sub>2</sub> (wormwiring.org)(16, 36).  
86 URX and RMG are both peptidergic, and at 21% O<sub>2</sub> tonically release neuropeptides  
87 (29, 36). RMG is connected by gap junctions to several other sensory neurons besides  
88 URX, including pheromone sensors (16, 37). Whether information communicated from  
89 URX to RMG about the O<sub>2</sub> environment modulates other sensory responses is  
90 unknown.

91           Here, we show that acclimating *C. elegans* to different O<sub>2</sub> environments  
92 gradually reconfigures its response to sensory cues. Animals acclimated to 7% O<sub>2</sub> but  
93 not 21% O<sub>2</sub> are aroused by CO<sub>2</sub>. Pheromones that attract animals acclimated at 21%  
94 O<sub>2</sub> repel animals acclimated to 7% O<sub>2</sub>. These changes are driven by experience-  
95 dependent remodelling of URX O<sub>2</sub> sensors, RMG interneurons, and the ASK and ADL  
96 pheromone sensors.

97

## 98 **RESULTS**

### 99 **Acclimation to different O<sub>2</sub> environments reprograms CO<sub>2</sub> responses**

100 *C. elegans* escape 21% O<sub>2</sub>, which signals that animals are at the surface, and  
101 accumulate at 7% O<sub>2</sub>, which indicates that animals are burrowed (29, 31, 32). We  
102 speculated that *C. elegans* gradually change their sensory preferences when shifted  
103 between these two environments.

104           To test our hypothesis, we first examined responses to CO<sub>2</sub>. CO<sub>2</sub> is aversive to  
105 *C. elegans*, and its concentration rises as O<sub>2</sub> levels fall, due to respiration. Animals

106 escaping 21% O<sub>2</sub> will thus often encounter high CO<sub>2</sub>, creating conflicting drives that we  
107 thought could be ecologically significant. Previous work showed that *C. elegans*  
108 immediately suppresses CO<sub>2</sub> avoidance when O<sub>2</sub> levels approach 21%, due to  
109 increased tonic signalling from URX O<sub>2</sub> sensors (38–41). We speculated that not only  
110 current but also prior O<sub>2</sub> experience remodels *C. elegans*' CO<sub>2</sub> responses. To test this,  
111 we kept wild isolates from California, France, and Hawaii overnight at 21% or 7% O<sub>2</sub>,  
112 and compared their responses to 3% CO<sub>2</sub> on a thin lawn of bacteria kept at 7% O<sub>2</sub>.  
113 After halting briefly, animals acclimated to 7% O<sub>2</sub> became persistently aroused at 3%  
114 CO<sub>2</sub> (**Fig. S1A–C**), unlike animals acclimated to 21% O<sub>2</sub>.

115 To probe this plasticity, we studied the N2 lab strain. Unlike natural isolates, N2  
116 is aroused by 3% CO<sub>2</sub> regardless of prior O<sub>2</sub> experience (**Fig. 1A**). In N2, output from  
117 the RMG interneurons, a major relay of the circuit signalling 21% O<sub>2</sub>, is blocked by a  
118 hyperactive neuropeptide receptor, NPR-1 215V (36, 37). Natural *C. elegans* isolates  
119 have a less active receptor, NPR-1 215F, which does not block RMG output (42). Does  
120 this account for altered CO<sub>2</sub> responses? Disrupting *npr-1* caused N2 animals to behave  
121 like natural isolates, and to inhibit CO<sub>2</sub>-evoked arousal when acclimated to 21% O<sub>2</sub>  
122 (**Fig. 1A**). The effects of acclimating *npr-1* animals to 7% O<sub>2</sub> developed over 16 hours,  
123 and were reversed within 3 hours if animals were transferred to 21% O<sub>2</sub> (**Fig. S2A, B**).  
124 Selectively expressing NPR-1 215V in RMG interneurons prevented *npr-1* animals from  
125 acclimating to 21% O<sub>2</sub> (**Fig. 1B**), and disrupting the GCY-35 soluble guanylate cyclase,  
126 a molecular O<sub>2</sub> sensor in URX required for the URX – RMG circuit to signal 21% O<sub>2</sub>  
127 (29, 31, 32, 34, 43) had the same effect (**Fig. 1C**).

128 The NPR-1 215V receptor inhibits RMG peptidergic transmission (36). We  
129 speculated that circuitry effects of prior O<sub>2</sub> experience might reflect prolonged  
130 differences in RMG peptidergic release. To test this we selectively knocked down the  
131 carboxypeptidase E ortholog *egl-21* in RMG using RNAi. Processing of most *C.*

132 *C. elegans* neuropeptides depends on EGL-21 (44). RMG-knockdown of *egl-21* prevented  
133 *npr-1* animals from acclimating to 21% O<sub>2</sub> (**Fig. 1D**). These data suggest that  
134 neuropeptide release from RMG is required for *C. elegans* acclimated to 21% O<sub>2</sub> to  
135 suppress CO<sub>2</sub>-evoked arousal.

136

### 137 **Pheromone valence changes with prior O<sub>2</sub> experience**

138 We studied how prior O<sub>2</sub> experience alters CO<sub>2</sub> responses because of the special  
139 relationship between these gases. *C. elegans* has, however, many CO<sub>2</sub>-responsive  
140 neurons, complicating analysis of how persistent differences in RMG activity alter the  
141 CO<sub>2</sub> circuits (39, 45, 46). Several studies have reported differences in the sensory  
142 responses of N2 and *npr-1* mutants associated with altered RMG function (36, 37, 47,  
143 48). We speculated that at least some of these differences could reflect a diminished  
144 capacity of N2 animals to acclimate to 21% O<sub>2</sub> due to reduced neurosecretion from  
145 RMG.

146 One such behavior is pheromone preference (37). Select pheromone blends  
147 attract *npr-1* hermaphrodites but repel N2 hermaphrodites (37, 49). We replicated  
148 these observations using an equimolar 10 nM mix of asc- $\omega$ C3 (ascaroside C3), asc-C6-  
149 MK (ascaroside C6), and asc- $\Delta$ C9 (ascaroside C9) pheromones, (37, 50–52) (**Fig. 2A**).  
150 We then asked if acclimating N2 and *npr-1* hermaphrodites overnight in different O<sub>2</sub>  
151 environments altered their pheromone response. We assayed animals at 21% O<sub>2</sub>.  
152 Whereas *npr-1* animals acclimated to 21% O<sub>2</sub> were attracted to the pheromone mix,  
153 *npr-1* animals acclimated to 7% O<sub>2</sub> robustly avoided it (**Fig. 2B**). Acclimating N2  
154 animals at different O<sub>2</sub> levels did not alter pheromone avoidance (**Fig. 2B**),  
155 recapitulating our observations with CO<sub>2</sub> (**Fig. 2SC**) Disrupting *gcy-35* switched the  
156 pheromone attraction exhibited by *npr-1* animals acclimated at 21% O<sub>2</sub> into repulsion  
157 (**Fig. 2B**). In summary, reducing the activity of O<sub>2</sub> sensing circuitry for prolonged

158 periods of time – either via environmental or genetic manipulation – transforms  
159 pheromone attraction to pheromone avoidance.

160

### 161 **O<sub>2</sub> experience changes pheromone responses in ASK neurons**

162 How does prior O<sub>2</sub> experience switch pheromone valence? The altered  
163 behavior must reflect some lasting change in the circuitry that couples sensory  
164 detection to motor output. The principal neurons driving pheromone attraction are the  
165 ASK ciliated head neurons. ASK responds to pheromone with a decrease in Ca<sup>2+</sup> (the  
166 ‘ON’ response) that quickly returns to above baseline when pheromone is removed (the  
167 ‘OFF’ response). The pheromone-evoked Ca<sup>2+</sup> response in ASK is bigger in *npr-1*  
168 animals compared to N2 animals, a difference thought to contribute to the opposite  
169 pheromone preference of these strains (37). Does prior O<sub>2</sub> experience change the  
170 responsiveness of ASK to pheromones? To test this, we measured pheromone-evoked  
171 Ca<sup>2+</sup> responses in ASK using the ratiometric Ca<sup>2+</sup> indicator YC3.60. Overnight  
172 acclimation at 7% O<sub>2</sub> attenuated the ASK pheromone response in *npr-1* animals to  
173 levels found in N2 (**Fig. 2C and 2D**). Thus, prior O<sub>2</sub> experience alters ASK pheromone  
174 responses, commensurate with a change in behavioural preference..

175

### 176 **Peptidergic feedback heightens RMG responsiveness to 21% O<sub>2</sub> after sustained** 177 **exposure to 21% O<sub>2</sub>**

178 RMG interneurons are connected to both the URX O<sub>2</sub> receptors and the ASK  
179 pheromone sensors via gap junctions (wormwiring.org)(16, 37). A simple prediction  
180 made by our data is that the response properties of RMG change when *npr-1* animals  
181 are acclimated to different O<sub>2</sub> levels, and this alters the properties of ASK. To explore  
182 this we compared the RMG Ca<sup>2+</sup> responses evoked by 21% O<sub>2</sub> in *npr-1* animals  
183 acclimated to 21% and 7% O<sub>2</sub>. Animals acclimated to 7% O<sub>2</sub> showed significantly

184 smaller RMG responses than those acclimated to 21% O<sub>2</sub> (**Fig. 3A and 3B**). Persistent  
185 exposure to 21% O<sub>2</sub> increases RMG responses to this stimulus.

186 To probe this change in RMG properties we compared the URX Ca<sup>2+</sup> responses  
187 evoked by 21% O<sub>2</sub> in animals acclimated to 21% and 7% O<sub>2</sub>. URX drives RMG  
188 responses (36). URX responses were smaller in animals acclimated to 7% O<sub>2</sub> (**Fig. 3C**  
189 **and 3D**), suggesting changes in RMG properties partly reflect plasticity in URX. In  
190 addition, acclimating *npr-1* animals to 21% O<sub>2</sub> was unable to increase RMG  
191 responsiveness to 21% O<sub>2</sub> if we selectively knocked down peptidergic transmission  
192 from RMG by RNAi of EGL-21 CPE (**Fig. 3A and 3B**). These data suggest there is a  
193 positive feedback loop by which tonic peptidergic signalling from RMG in *npr-1* animals  
194 kept at 21% O<sub>2</sub> increases RMG responsiveness to 21% O<sub>2</sub>. Experience-dependent  
195 plasticity in RMG and URX represent neural correlates of acclimation to different O<sub>2</sub>  
196 environments.

197 Importantly, RNAi knockdown of EGL-21 in RMG altered pheromone responses  
198 of *npr-1* animals acclimated to 21% O<sub>2</sub>, reducing pheromone-evoked Ca<sup>2+</sup> responses in  
199 ASK to N2-like levels (**Fig. 3E and 3F**), and conferring robust pheromone avoidance  
200 (**Fig. 3G**). Thus, peptidergic signalling from RMG mediates multiple effects of  
201 acclimation to 21% O<sub>2</sub>: an increase tonic Ca<sup>2+</sup> response to 21% O<sub>2</sub> in RMG, a bigger  
202 ASK response to pheromone cues, and decreased *C. elegans* avoidance of  
203 pheromone.

204

### 205 **Communication between neurons in the RMG circuit**

206 The neuroanatomy suggests RMG is gap-junctionally connected to multiple sensory  
207 neurons, including ASK, the ADL and ASH nociceptors, the AWB olfactory neurons,  
208 and the IL2 chemo/mechanoreceptors (**Fig. 4A**) ([wormwiring.org](http://wormwiring.org))(16). Changes in  
209 RMG may therefore influence the signalling properties of each of these neurons, and



210 vice-versa. Previous studies suggest that the O<sub>2</sub>-sensing URX neurons cooperate with  
211 the nociceptive ADL and ASH neurons, and the ASK pheromone sensors, to promote  
212 *C. elegans* aggregation and escape from 21% O<sub>2</sub> (33, 36, 37, 53). However, in the  
213 absence of physiological data it is unclear what information RMG neurons receive or  
214 transmit, apart from tonic O<sub>2</sub> input from URX (29)(36). We asked if O<sub>2</sub>-evoked  
215 responses in RMG propagated to ADL and ASK. The wiring diagram suggests ASK  
216 and ADL are connected to RMG exclusively via gap junctions. ASK and ADL each  
217 showed O<sub>2</sub>-evoked Ca<sup>2+</sup> responses in *npr-1* animals (**Fig. S3A–S3D**). We also imaged  
218 RMG responses evoked by the pheromone mix we used to stimulate ASK (**Fig. 4B**).  
219 RMG responded with Ca<sup>2+</sup> dynamics similar to those observed in ASK (**Fig. 4B**),  
220 suggesting information can flow from ASK to RMG. These results support a hub-and-  
221 spoke model in which different sensory inputs are integrated through gap junctions with  
222 the RMG hub (37).

223 NPR-1 215V signalling has been proposed to silence the hub-and-spoke circuit  
224 (24, 27). One attractive model is that signalling from the neuropeptide receptor closes  
225 RMG gap junctions (37, 49). To investigate this, we first compared pheromone-evoked  
226 Ca<sup>2+</sup> responses in RMG in N2 and *npr-1* animals, but did not observe any significant  
227 differences (**Fig. 4C and 4D**). We then compared O<sub>2</sub>-evoked responses in ASK, and  
228 also did not observe differences between the two genotypes (**Fig. S3A and S3B**). By  
229 contrast, *npr-1* but not N2 animals displayed a strong O<sub>2</sub>-evoked response in ADL  
230 neurons, (**Fig. S3C and S3D**); this response, unlike the ADL pheromone response (see  
231 below), did not require the TRPV1 ortholog OCR-2 (**Fig. S4A–S4D**). Although other  
232 interpretations are possible, a simple model to explain our data is that NPR-1 215V  
233 signalling in RMG affects different gap junctions differently, inhibiting RMG – ADL  
234 communication but having smaller or no effects on the RMG - ASK connection.  
235

236 **O<sub>2</sub> experience sculpts RMG and ADL pheromone responses**

237 The pheromone attraction mediated by ASK neurons and promoted by RMG  
238 signalling is proposed to antagonize pheromone avoidance driven by the ADL neurons  
239 in a push-pull mechanism (49). The relative strength of these arms determines the  
240 animal's response. We found that acclimating *npr-1* animals to 7% O<sub>2</sub> greatly reduced  
241 pheromone-evoked responses in RMG compared to animals kept at 21% O<sub>2</sub> (**Fig. 4C**  
242 and **4D**). Thus, acclimation to 7% O<sub>2</sub> weakens both the ASK (**Fig. 2C** and **2D**) and  
243 RMG circuit elements that drive attraction to pheromone.

244 Given the neuroanatomy, and the ability of RMG to influence Ca<sup>2+</sup> in ADL,  
245 changes in pheromone-evoked ASK – RMG responses associated with acclimation to  
246 different O<sub>2</sub> levels might alter pheromone-evoked responses in ADL. ADL neurons are  
247 activated by the ascaroside C9, and a drop of C9 increases the probability of animals  
248 reversing (49). In this behavioral paradigm the fraction of animals reversing provides a  
249 measure of the pheromone's repulsiveness, and is significantly higher in N2 than *npr-1*  
250 animals at low pheromone concentrations (10 nM). Higher concentrations of C9 elicit  
251 strong repulsion irrespective of *npr-1* genotype (49). We confirmed that N2 animals  
252 showed enhanced repulsion from 10 nM C9 compared to *npr-1* animals (**Fig. 4E**). We  
253 then showed that *npr-1* animals acclimated overnight to 7% O<sub>2</sub> enhanced their  
254 avoidance of C9, and behaved indistinguishably from N2 (**Fig. 4E**). The avoidance  
255 index (A.I.) used in this assay (49, 54) is calculated as [(fraction reversing to  
256 pheromone) – (fraction reversing to buffer alone)], and any change in the A.I. could  
257 reflect an altered response to the buffer rather than to C9. Consistent with enhanced  
258 pheromone avoidance, *npr-1* animals reversed more in response to C9 if they were  
259 acclimated to 7% O<sub>2</sub> (**Fig. 4E**).

260 Pheromone-evoked Ca<sup>2+</sup> responses in ADL neurons were previously  
261 characterized using 100 nM C9, a concentration that elicits strong and comparable

262 repulsion in N2 and *npr-1* animals (49). By using GCaMP6 var500 we could record  
263 ADL responses to 10 nM C9, and assess the impact of previous O<sub>2</sub> experience under  
264 conditions similar to those used in behavioral assays. *npr-1* animals acclimated to 7%  
265 O<sub>2</sub> showed significantly bigger ADL Ca<sup>2+</sup> responses compared to siblings acclimated to  
266 21% O<sub>2</sub> (**Fig. 4F** and 4G). Together our data suggest that acclimation to 7% O<sub>2</sub>  
267 simultaneously weakens the ASK and RMG circuit elements that drive attraction to  
268 pheromone, and strengthens the ADL pheromone response driving repulsion, thereby  
269 switching the animal's behavioral choice.

270

## 271 **DISCUSSION**

272 Unfavorable environments can evoke slow, sustained changes in behavioral priorities  
273 that reflect an altered internal state. The neural mechanisms mediating such  
274 integrative, experience-dependent plasticity are poorly understood. *C. elegans*  
275 persistently attempts to escape 21% O<sub>2</sub> (29), presumably because this O<sub>2</sub>  
276 concentration signals unfavorable surface exposure (31, 32). We find that the O<sub>2</sub> milieu  
277 experienced recently by *C. elegans* changes the way it processes sensory information.  
278 Pheromones that attract *C. elegans* acclimated to 21% O<sub>2</sub> repel animals acclimated to  
279 7% O<sub>2</sub>; 3% CO<sub>2</sub> triggers sustained arousal in animals acclimated to 7% O<sub>2</sub> but has  
280 comparatively little effect in animals acclimated to 21% O<sub>2</sub>.

281 A memory of previous O<sub>2</sub> experience arises from prolonged differences in the  
282 activity of a tonically active circuit. Exposure to 21% O<sub>2</sub> tonically stimulates the URX O<sub>2</sub>  
283 receptor neurons and their synaptic partners, the RMG interneurons. Sustained  
284 stimulation of URX and RMG at 21% O<sub>2</sub> increases their response to 21% O<sub>2</sub>. The  
285 reprogramming of RMG requires peptidergic signaling competence in this interneuron.  
286 Our data suggest a simple model in which over time, sustained peptide release from  
287 RMG at 21% O<sub>2</sub> feeds back to alter RMG properties. In animals kept at 7% O<sub>2</sub> peptide

288 release from RMG is low, disrupting the feedback. In this neural integrator model  
289 hysteresis in the build up and decay of peptide signaling accounts for the time delays  
290 as animals acclimate to 7% or 21% O<sub>2</sub>. We previously showed that neuropeptide  
291 expression in RMG is positively coupled to neurosecretion from RMG (Laurent et al.,  
292 2015), consistent with a positive feedback loop in this interneuron. Tonic circuit activity  
293 is common in brains. We speculate that such circuits will often store information about  
294 their activity history, and potentially about the animal's experience, by incorporating  
295 peptidergic positive feedback loops.

296 RMG has neuroanatomical gap junctions not only with URX, but also with the  
297 ASK and ADL pheromone sensors (16, 37). This arrangement suggests that  
298 information can be integrated across the circuit (Macosko et al., 2009), but  
299 physiological data was hitherto absent. We show that ASK and ADL show O<sub>2</sub>-evoked  
300 Ca<sup>2+</sup> responses, and that acclimating animals to different O<sub>2</sub> levels alters O<sub>2</sub> and / or  
301 pheromone-evoked responses in each of the URX, RMG, ASK and ADL neurons.  
302 Inhibiting peptidergic transmission from RMG prevents RMG and ASK neurons from  
303 changing their pheromone responsive properties in animals acclimated to 21% O<sub>2</sub>; it  
304 also prevents the experience dependent switch in pheromone valence.

305 Changes in the pheromone-evoked responses of ASK and ADL neurons are  
306 consistent with changes in RMG changing communication across the network. For  
307 example, in animals acclimated to 21% O<sub>2</sub> pheromone-evoked responses in ASK could  
308 inhibit ADL pheromone responses, whereas in animals acclimated at 7% O<sub>2</sub> this  
309 communication may be less potent. While this is plausible, we cannot exclude that the  
310 intrinsic properties of several neurons in the circuit are altered by O<sub>2</sub> experience.

311 We see parallels between our observations and a *Drosophila* study showing  
312 that repeated presentation of an aversive shadow cue leads to a persistent change in  
313 behavioral state that scales with the number and frequency of the presentations (55,

314 56). Our findings are also reminiscent of ‘latent modulation’ in the feeding network of  
315 *Aplysia*, where the history of activation in some circuit elements has a lasting effect on  
316 subsequent responses, most likely by changing neuronal excitability through  
317 peptidergic modulation (57, 58).

318         Why should *C. elegans* reconfigure its sensory responses according to prior O<sub>2</sub>  
319 experience? It is tempting to speculate about a behavioral hierarchy (59) that gives  
320 priority to escape from 21% O<sub>2</sub>, and that dominates over sensory drives that could  
321 hinder escape from the surface. Animals at the surface may gradually suppress their  
322 aversion to CO<sub>2</sub> to facilitate escape to low O<sub>2</sub>/high CO<sub>2</sub> environments. Once the threat  
323 of exposure at the surface recedes, strong aversive responses to CO<sub>2</sub> again become  
324 adaptive. In a boom-and-bust species like *C. elegans* (18), pheromones may be  
325 aversive because they predict an unsustainable population density. However, if  
326 escaping the surface is more important than accumulating in a crowded environment,  
327 attraction towards pheromones may be transiently adaptive because crowded  
328 environments predict reduced O<sub>2</sub>. Irrespective of the precise selective advantage(s),  
329 our data suggest *C. elegans* can adopt alternate persistent internal states according to  
330 the length of time they have been exposed to aversive or preferred O<sub>2</sub> levels. In these  
331 states neural circuits process sensory information differently, changing the animal’s  
332 behavioral priorities.

333

### 334 **ACKNOWLEDGEMENTS**

335 We thank Rebecca Butcher for ascarosides, the *Caenorhabditis* Genetics Centre for  
336 strains, and members of the de Bono and Schafer labs for advice and comments. This  
337 work was supported by the European Research Council (AdG 269058) and the Medical  
338 Research Council (UK).

339

340 **AUTHOR CONTRIBUTIONS**

341 L.F and M.d.B designed experiments, L.F. performed the experiments, L.F. and M.d.B  
342 analysed the data and wrote the manuscript.

343

344 **MATERIALS AND METHODS**

345 **Strains**

346 Strains were grown and maintained under standard conditions with *E. coli* OP50 as  
347 food (60). To cultivate animals in specific O<sub>2</sub> environments we used a Coy O<sub>2</sub> control  
348 glove box (Coy, Michigan, USA).

349 **Behavioral Assays**

350 Locomotion assays were performed as described previously (45, 46). 20–25 adult  
351 hermaphrodites were picked to NGM plates seeded 16–20 h earlier with 20  $\mu$ L of *E.*  
352 *coli* OP50 grown in 2 xTY. To create a behavioral arena with a defined atmosphere we  
353 lowered a 1 cm  $\times$  1 cm  $\times$  200  $\mu$ m deep polydimethylsiloxane (PDMS) chamber on top  
354 of the worms, with inlets connected to a PHD 2000 Infusion syringe pump (Harvard  
355 apparatus). We pumped in defined gas mixtures (BOC, UK) that were humidified using  
356 a sintered gas bubbler (SciLabware, UK) at a flow rate of 3.0 mL/min. Movies were  
357 recorded at 2 frames/s using a Point Gray Grasshopper camera mounted on a Leica  
358 M165FC dissecting microscope, and were analysed using custom-written Matlab  
359 software (36) to detect omega turns and calculate instantaneous speed.

360 Chemotaxis to pheromones was assayed essentially as described previously (37, 61),  
361 using four-quadrant Petri plates (Falcon X plate, Becton Dickinson Labware, USA). For  
362 each assay 200 worms were picked to a fresh seeded plate for 2–3 hours, washed  
363 three times with chemotaxis buffer, and placed at the centre of a 10 cm assay plate  
364 with pheromones in alternating quadrants. Animals were scored after  $\sim$  15 min and a  
365 chemotaxis index calculated as (number of animals on pheromone quadrants – number

366 of animals on buffer quadrants) / (total number of animals). We used an equimolar (10  
367 nm) mix of the ascarosides C3, C6, and C9. Assays were repeated on at least 4  
368 different days.

369 Acute C9 avoidance was examined in the presence of food, using the drop test (62)  
370 and as described by Jang and colleagues (49, 54). Responses were scored as  
371 reversals if animals initiated a backward movement within 4 s after stimulation that was  
372 equal or longer than half their body length. The fraction reversing is given by (number  
373 of animals that make a long reversal) / (number of total animals tested); the effect size  
374 or avoidance index was calculated as (fraction reversing to pheromone) – (fraction  
375 reversing to buffer alone).

#### 376 **Ca<sup>2+</sup> Imaging.**

377 Ca<sup>2+</sup> imaging was performed as described previously (37, 49, 63), using microfluidic  
378 devices (MicroKosmos, Ann Arbor, MI) to immobilize animals and either a 1:1:1 ratio of  
379 three ascarosides (C3, C6, C9) or C9 alone, at the concentration indicated (10nm –  
380 100 nm). For O<sub>2</sub> and CO<sub>2</sub> experiments, worms were glued to agarose pads (2% in M9  
381 buffer, 1 mM CaCl<sub>2</sub>) using Dermabond tissue adhesive, with the nose and tail  
382 immersed in M9 buffer (45, 46). All imaging was performed on an inverted microscope  
383 (Axiovert; Zeiss) with a 40× C-Apochromat lens (water immersion, N.A. 1.0), and  
384 MetaMorph acquisition software (Molecular Devices). Recordings were at two frames/s  
385 with a 100 ms exposure time. Photobleaching was minimized using optical density filter  
386 2.0 or 1.5. For ratiometric imaging experiments we used an excitation filter (Chroma) to  
387 restrict illumination to the cyan channel, and a beam splitter (Optical Insights) to  
388 separate the cyan and yellow emission light. Animals were pre-exposed to excitation  
389 light for ~ 1 min in all experiments. A custom-written Matlab script was used to analyze  
390 image stacks(36).

#### 391 **Molecular Biology and Generation of Transgenic Lines.**

392 Expression constructs were made using the MultiSite Gateway Three-Fragment Vector  
393 Construct Kit (Life Technologies). Promoters used include: *sra-9* (3 kb; ASK), *sre-1* (4  
394 kb; ADL), *flp-21* and *ncs-1* (RMG). Promoter fragments were amplified from genomic  
395 DNA and cloned in the first position of the Gateway system, genes of interest in the  
396 second position, and the *unc-54* 3' UTR or the SL2::mCherry sequence in the third  
397 position. Constructs were injected at 30–55 ng/μL, with a coinjection marker (*unc-*  
398 *122::RFP* or *unc-122::GFP*) at 50–60 ng/μL.

### 399 **Statistical methods**

400 Statistical analyses used Prism 6 (GraphPad) and MATLAB (MathWorks). No statistical  
401 method was used to predetermine sample size, which are similar to those generally  
402 employed in the field. Exact tests used are indicated in figure legends; imaging and  
403 locomotion data were analyzed using a non-parametric Mann-Whitney *U* or Wilcoxon  
404 signed-rank test.

405

### 406 **REFERENCES**

- 407 1. LeDoux J (2012) Rethinking the emotional brain. *Neuron* 73(4):653–676.
- 408 2. Saeki S, Yamamoto M, Iino Y (2001) Plasticity of chemotaxis revealed by paired  
409 presentation of a chemoattractant and starvation in the nematode *Caenorhabditis*  
410 *elegans*. *J Exp Biol* 204(Pt 10):1757–1764.
- 411 3. Kindt KS *et al.* (2007) Dopamine mediates context-dependent modulation of  
412 sensory plasticity in *C. elegans*. *Neuron* 55(4):662–676.
- 413 4. Su CY, Wang JW (2014) Modulation of neural circuits: how stimulus context  
414 shapes innate behavior in *Drosophila*. *Curr Opin Neurobiol* 29:9–16.
- 415 5. Hoopfer ED (2016) Neural control of aggression in *Drosophila*. *Curr Opin*  
416 *Neurobiol* 38:109–118.
- 417 6. Cohn R, Morante I, Ruta V (2015) Coordinated and Compartmentalized  
418 Neuromodulation Shapes Sensory Processing in *Drosophila*. *Cell* 163(7):1742–  
419 1755.
- 420 7. Oswald D, Waddell S (2015) Olfactory learning skews mushroom body output  
421 pathways to steer behavioral choice in *Drosophila*. *Curr Opin Neurobiol* 35:178–  
422 184.
- 423 8. Stowers L, Liberles SD (2016) State-dependent responses to sex pheromones in  
424 mouse. *Curr Opin Neurobiol* 38:74–79.
- 425 9. Chaffee RR, Roberts JC (1971) Temperature acclimation in birds and mammals.  
426 *Annu Rev Physiol* 33:155–202.
- 427 10. Lewis L, Ayers J (2014) Temperature preference and acclimation in the Jonah  
428 Crab, *Cancer borealis*. *Journal of Experimental Marine Biology and Ecology*
- 429 11. Chown SL, Sørensen JG, Terblanche JS (2011) Water loss in insects: an



- 430 environmental change perspective. *J Insect Physiol* 57(8):1070–1084.
- 431 12. Tauber E, Kyriacou BP (2001) Insect photoperiodism and circadian clocks:  
432 models and mechanisms. *J Biol Rhythms* 16(4):381–390.
- 433 13. Prabhakar NR *et al.* (2009) Long-term regulation of carotid body function:  
434 acclimatization and adaptation--invited article. *Adv Exp Med Biol* 648:307–317.
- 435 14. Turner SL, Ray A (2009) Modification of CO<sub>2</sub> avoidance behaviour in *Drosophila*  
436 by inhibitory odorants. *Nature* 461(7261):277–281.
- 437 15. Grosjean Y *et al.* (2011) An olfactory receptor for food-derived odours promotes  
438 male courtship in *Drosophila*. *Nature* 478(7368):236–240.
- 439 16. White JG, Southgate E, Thomson JN, Brenner S (1986) The structure of the  
440 nervous system of the nematode *Caenorhabditis elegans*. *Philosophical*  
441 *Transactions of the Royal Society of London B*(314):1–340.
- 442 17. Felix MA, Braendle C (2010) The natural history of *Caenorhabditis elegans*. *Curr*  
443 *Biol* 20(22):R965–9.
- 444 18. Frézal L, Félix MA (2015) *C. elegans* outside the Petri dish. *Elife* 4
- 445 19. Rengarajan S, Hallem EA (2016) Olfactory circuits and behaviors of nematodes.  
446 *Curr Opin Neurobiol* 41:136–148.
- 447 20. Goodman MB (2006) Mechanosensation. *WormBook* 1–14.
- 448 21. Bargmann CI (2006) Chemosensation in *C. elegans*. *WormBook* 1–29.
- 449 22. Aoki I, Mori I (2015) Molecular biology of thermosensory transduction in *C.*  
450 *elegans*. *Curr Opin Neurobiol* 34:117–124.
- 451 23. Denk W, Briggman KL, Helmstaedter M (2012) Structural neurobiology: missing  
452 link to a mechanistic understanding of neural computation. *Nat Rev Neurosci*  
453 13(5):351–358.
- 454 24. Bargmann CI, Marder E (2013) From the connectome to brain function. *Nat*  
455 *Methods* 10(6):483–490.
- 456 25. Koch C, Laurent G (1999) Complexity and the nervous system. *Science*  
457 284(5411):96–98.
- 458 26. Marder E (2012) Neuromodulation of neuronal circuits: back to the future. *Neuron*  
459 76(1):1–11.
- 460 27. Bargmann CI (2012) Beyond the connectome: how neuromodulators shape  
461 neural circuits. *Bioessays* 34(6):458–465.
- 462 28. Graebner AK, Iyer M, Carter ME (2015) Understanding how discrete populations  
463 of hypothalamic neurons orchestrate complicated behavioral states. *Front Syst*  
464 *Neurosci* 9:111.
- 465 29. Busch KE *et al.* (2012) Tonic signaling from O<sub>2</sub> sensors sets neural circuit  
466 activity and behavioral state. *Nat Neurosci* 15(4):581–591.
- 467 30. Rogers C, Persson A, Cheung B, de Bono M (2006) Behavioral motifs and neural  
468 pathways coordinating O<sub>2</sub> responses and aggregation in *C. elegans*. *Curr Biol*  
469 16(7):649–659.
- 470 31. Persson A *et al.* (2009) Natural variation in a neural globin tunes oxygen sensing  
471 in wild *Caenorhabditis elegans*. *Nature* 458(7241):1030–1033.
- 472 32. Gray JM *et al.* (2004) Oxygen sensation and social feeding mediated by a *C.*  
473 *elegans* guanylate cyclase homologue. *Nature* 430(6997):317–322.
- 474 33. Coates JC, de Bono M (2002) Antagonistic pathways in neurons exposed to body  
475 fluid regulate social feeding in *Caenorhabditis elegans*. *Nature* 419(6910):925–  
476 929.
- 477 34. Zimmer M *et al.* (2009) Neurons detect increases and decreases in oxygen levels  
478 using distinct guanylate cyclases. *Neuron* 61(6):865–879.
- 479 35. McGrath PT *et al.* (2009) Quantitative mapping of a digenic behavioral trait  
480 implicates globin variation in *C. elegans* sensory behaviors. *Neuron* 61(5):692–  
481 699.

- 482 36. Laurent P *et al.* (2015) Decoding a neural circuit controlling global animal state in  
483 *C. elegans*. *Elife* 4
- 484 37. Macosko EZ *et al.* (2009) A hub-and-spoke circuit drives pheromone attraction  
485 and social behaviour in *C. elegans*. *Nature* 458(7242):1171–1175.
- 486 38. Bretscher AJ, Busch KE, de Bono M (2008) A carbon dioxide avoidance behavior  
487 is integrated with responses to ambient oxygen and food in *Caenorhabditis*  
488 *elegans*. *Proc Natl Acad Sci U S A* 105(23):8044–8049.
- 489 39. Hallem EA, Sternberg PW (2008) Acute carbon dioxide avoidance in  
490 *Caenorhabditis elegans*. *Proc Natl Acad Sci U S A* 105(23):8038–8043.
- 491 40. Kodama-Namba E *et al.* (2013) Cross-modulation of homeostatic responses to  
492 temperature, oxygen and carbon dioxide in *C. elegans*. *PLoS Genet*  
493 9(12):e1004011.
- 494 41. Carrillo MA, Guillermin ML, Rengarajan S, Okubo RP, Hallem EA (2013) O<sub>2</sub>-  
495 Sensing Neurons Control CO<sub>2</sub> Response in *C. elegans*. *J Neurosci* 33(23):9675–  
496 9683.
- 497 42. de Bono M, Bargmann CI (1998) Natural variation in a neuropeptide Y  
498 receptor homolog modifies social behavior and food response in *C.*  
499 *elegans*. *Cell* 94(5):679–689.
- 500 43. Cheung BH, Arellano-Carbajal F, Rybicki I, De Bono M (2004) Soluble  
501 Guanylate Cyclases Act in Neurons Exposed to the Body Fluid to Promote  
502 *C. elegans* Aggregation Behavior. *Curr Biol* 14(12):1105–1111.
- 503 44. Husson SJ *et al.* (2007) Impaired processing of FLP and NLP peptides in  
504 carboxypeptidase E (EGL-21)-deficient *Caenorhabditis elegans* as analyzed by  
505 mass spectrometry. *J Neurochem* 102(1):246–260.
- 506 45. Fenk LA, de Bono M (2015) Environmental CO<sub>2</sub> inhibits *Caenorhabditis elegans*  
507 egg-laying by modulating olfactory neurons and evokes widespread changes in  
508 neural activity. *Proc Natl Acad Sci U S A* 112(27):E3525–34.
- 509 46. Bretscher AJ *et al.* (2011) Temperature, Oxygen, and Salt-Sensing Neurons in *C.*  
510 *elegans* Are Carbon Dioxide Sensors that Control Avoidance Behavior. *Neuron*  
511 69(6):1099–1113.
- 512 47. Glauser DA *et al.* (2011) Heat avoidance is regulated by transient receptor  
513 potential (TRP) channels and a neuropeptide signaling pathway in *Caenorhabditis*  
514 *elegans*. *Genetics* 188(1):91–103.
- 515 48. Choi S, Chatzigeorgiou M, Taylor KP, Schafer WR, Kaplan JM (2013) Analysis of  
516 NPR-1 reveals a circuit mechanism for behavioral quiescence in *C. elegans*.  
517 *Neuron* 78(5):869–880.
- 518 49. Jang H *et al.* (2012) Neuromodulatory state and sex specify alternative behaviors  
519 through antagonistic synaptic pathways in *C. elegans*. *Neuron* 75(4):585–592.
- 520 50. Butcher RA, Fujita M, Schroeder FC, Clardy J (2007) Small-molecule  
521 pheromones that control dauer development in *Caenorhabditis elegans*. *Nat*  
522 *Chem Biol* 3(7):420–422.
- 523 51. Butcher RA, Ragains JR, Kim E, Clardy J (2008) A potent dauer pheromone  
524 component in *Caenorhabditis elegans* that acts synergistically with other  
525 components. *Proc Natl Acad Sci U S A* 105(38):14288–14292.
- 526 52. Zhang X, Noguez JH, Zhou Y, Butcher RA (2013) Analysis of ascarosides from  
527 *Caenorhabditis elegans* using mass spectrometry and NMR spectroscopy.  
528 *Methods Mol Biol* 1068:71–92.
- 529 53. de Bono M, Tobin DM, Davis MW, Avery L, Bargmann CI (2002) Social feeding in  
530 *Caenorhabditis elegans* is induced by neurons that detect aversive stimuli. *Nature*  
531 419(6910):899–903.
- 532 54. Jang H, Bargmann CI (2013) Acute behavioral responses to pheromones in *C.*  
533 *elegans* (adult behaviors: attraction, repulsion). *Methods Mol Biol* 1068:285–292.

- 534 55. Gibson WT *et al.* (2015) Behavioral responses to a repetitive visual threat  
535 stimulus express a persistent state of defensive arousal in *Drosophila*. *Curr Biol*  
536 25(11):1401–1415.
- 537 56. Anderson DJ (2016) Circuit modules linking internal states and social behaviour  
538 in flies and mice. *Nat Rev Neurosci* 17(11):692–704.
- 539 57. Dacks AM, Weiss KR (2013) Latent modulation: a basis for non-disruptive  
540 promotion of two incompatible behaviors by a single network state. *J Neurosci*  
541 33(9):3786–3798.
- 542 58. Marder E, O’Leary T, Shruti S (2014) Neuromodulation of circuits with variable  
543 parameters: single neurons and small circuits reveal principles of state-dependent  
544 and robust neuromodulation. *Annu Rev Neurosci* 37:329–346.
- 545 59. Tyrrell T (1993) The use of hierarchies for action selection. *Adaptive Behavior*
- 546 60. Brenner S (1974) The genetics of *Caenorhabditis elegans*. *Genetics* 77(1):71–94.
- 547 61. Hart AC (2006) Behavior. *WormBook* 1–87.
- 548 62. Hilliard MA, Bargmann CI, Bazzicalupo P (2002) *C. elegans* responds to chemical  
549 repellents by integrating sensory inputs from the head and the tail. *Curr Biol*  
550 12(9):730–734.
- 551 63. Chronis N, Zimmer M, Bargmann CI (2007) Microfluidics for in vivo imaging of  
552 neuronal and behavioral activity in *Caenorhabditis elegans*. *Nat Methods*  
553 4(9):727–731.
- 554

## 555 **FIGURE LEGENDS**

### 556 **Figure 1. Recent O<sub>2</sub> experience regulates CO<sub>2</sub>-evoked arousal**

557 **(A)** N<sub>2</sub> animals and *npr-1* animals acclimated to 7% O<sub>2</sub> exhibit a robust and  
558 persistent increase in speed when CO<sub>2</sub> levels rise to 3%, whereas, *npr-1*  
559 animals acclimated to 21% O<sub>2</sub> do not. n = 247–302 animals. \*\*\*\* p < 0.0001; ns,  
560 not significant; Wilcoxon signed-rank test. In this and subsequent figures solid  
561 lines indicate the mean and shaded areas represent the standard error of the  
562 mean (S.E.M). Black bars indicate time intervals used for statistical  
563 comparisons (boxplots). Assays were performed in the presence of food and  
564 background O<sub>2</sub> was kept at 7%. **(B)** Selective expression of NPR-1 215V in  
565 RMG, **(C)** knocking out *gcy-35*, or **(D)** RNAi-mediated knockdown of the  
566 carboxypeptidase E EGL-21 in RMG, prevent *npr-1* animals acclimated to 21%  
567 O<sub>2</sub> from suppressing CO<sub>2</sub>-evoked arousal. n = 104–235.

568 Boxes in this and all subsequent panels show the median (black line) and  
569 extend from the 25<sup>th</sup> to 75<sup>th</sup> percentiles and whiskers represent 10<sup>th</sup> to 90<sup>th</sup>  
570 percentiles.

571

## 572 **Figure 2. Pheromone valence changes with prior O<sub>2</sub> experience**

573 **(A)** Quadrant assay for pheromone preference (after (37)). **(B)** Behavioral  
574 responses to an equimolar 10 nM mix of C3, C6 and C9 ascaroside  
575 pheromones. *npr-1* animals acclimated to 21% O<sub>2</sub> are attracted to the  
576 pheromone whereas siblings acclimated to 7% O<sub>2</sub> robustly avoid it. N2 avoid  
577 pheromones irrespective of whether they have been acclimated to 7% or 21%  
578 O<sub>2</sub>. The soluble guanylate cyclase GCY-35 is required for normal O<sub>2</sub> responses  
579 and pheromone attraction in *npr-1* animals acclimated at 21% O<sub>2</sub>. \*\* p < 0.01;  
580 ns, not significant; One-way ANOVA with Tukey's multiple comparisons test. n =  
581 8 assays each. **(C)** Previous O<sub>2</sub> experience sculpts pheromone responses in  
582 ASK sensory neurons. Acclimation to 7% O<sub>2</sub> reduces pheromone-evoked Ca<sup>2+</sup>  
583 responses in ASK, consistent with altered behavioral preference. **(D)**  
584 Quantification of data shown in (C). Heat maps in this and all subsequent  
585 figures show individual Ca<sup>2+</sup> responses. n = 35–36 animals. \*\*\*\* p < 0.0001; \*\* p  
586 < 0.01; \*p < 0.05 ns, not significant; Mann-Whitney *U* test.

587

## 588 **Figure 3. Peptidergic feedback regulates RMG properties and pheromone** 589 **preference**

590 (A) Acclimation to 7% O<sub>2</sub>, or knockdown of *egl-21*, similarly reduce RMG Ca<sup>2+</sup>  
591 responses evoked by a 21% O<sub>2</sub> stimulus. (B) Quantification of data shown in  
592 (A). n = 20–21 animals. \* p < 0.05; ns, not significant; Mann-Whitney *U* test.  
593 (C) Acclimation to 7% O<sub>2</sub> reduces URX Ca<sup>2+</sup> responses evoked by a 21% O<sub>2</sub>  
594 stimulus. (D) Quantification of data shown in (C). n = 38–39 animals. \* p < 0.05;  
595 Mann-Whitney *U* test. (E) Knockdown of *egl-21* in RMG diminishes pheromone-  
596 evoked Ca<sup>2+</sup> responses in ASK to levels observed in N2. (F) Quantification of  
597 data shown in (E). n = 20–21 animals. \* p < 0.05; \*\* p < 0.01; \*\*\*\* p < 0.0001; ns,  
598 not significant; Mann-Whitney *U* test. (G) RNAi knockdown of *egl-21* in RMG  
599 prevents *npr-1* animals acclimated to 21% O<sub>2</sub> from being attracted to  
600 pheromone. n = 12 assays each. \* p < 0.05; One-way ANOVA followed by  
601 Dunnett's multiple comparisons test.

602

603 **Figure 4. RMG hub neurons respond to pheromones and alter their**  
604 **response according to recent O<sub>2</sub> experience**

605 (A) Circuit showing connections between RMG interneurons and O<sub>2</sub>-sensing,  
606 nociceptive, and pheromone-sensing neurons. (B) An equimolar (100 nM) mix  
607 of C3, C6, and C9 ascarosides inhibit RMG. n = 57 animals. (C) RMG shows  
608 robust pheromone responses in both *npr-1* and N2 animals. (D) Quantification  
609 of data shown in (C). n = 35–36 animals. ns, not significant; Mann-Whitney *U*  
610 test. (E) Acclimation to 7% O<sub>2</sub> alters RMG properties and diminishes both ON-  
611 and OFF-responses to pheromone addition and removal. (F) Quantification of  
612 data shown in (E). n = 36 animals each. \*\*\* p < 0.001; \*\*\*\* p < 0.0001; Mann-  
613 Whitney *U* test. (G–I) Acclimation to 7% O<sub>2</sub> enhances ADL pheromone

614 responses and acute pheromone repulsion. *npr-1* animals show decreased  
615 avoidance of the C9 ascaroside compared to N2 when grown under standard  
616 conditions, but not when acclimated to 7% O<sub>2</sub>. Plotted are the avoidance index  
617 (E) and fraction of animals reversing (E'), in response to a drop of diluted C9  
618 (10 nM) applied to the nose. n = 260–280 animals each. \* p < 0.05; \*\*\* p <  
619 0.001; \*\*\*\* p < 0.0001; ns, not significant; One-way ANOVA followed by Tukey's  
620 multiple comparisons test. (F) The Ca<sup>2+</sup> responses evoked in ADL by 10 nM C9  
621 pheromone are larger in *npr-1* animals acclimated to 7% O<sub>2</sub> compared to  
622 siblings acclimated at 21% O<sub>2</sub>. (G) Quantification of data plotted in (F). n = 23–  
623 24 animals. \*\* p < 0.01; Mann-Whitney U test. (H) Model.

624

625

## 626 SUPPLEMENTAL FIGURES

627 **Figure S1. Acclimation to different O<sub>2</sub> environments reprograms CO<sub>2</sub>**  
628 **responses in natural *C. elegans* isolates.**

629 (A–C) Wild strains modulate their CO<sub>2</sub> response according to recent O<sub>2</sub>  
630 experience. These strains encode NPR-1 215F, the natural low activity isoform  
631 of NPR-1. n = 116–171.

632

633 **Figure S2. Time line and reversibility of acclimation to different O<sub>2</sub> levels.**

634 (A and B) Mean speed of *npr-1* animals at 3% CO<sub>2</sub>, plotted against time  
635 exposed to 7% or atmospheric (~ 21%) O<sub>2</sub>. (A) Acclimation to 7% happens  
636 gradually and animals continue to increase their speed over many hours. n =  
637 151–171. (B) Acclimation is reversed rapidly, and after ≤ 3 hours animals  
638 behave like siblings grown at 21% O<sub>2</sub>. n = 138–188. Error bars in (A and B) and

639 shaded regions in (A' and B') represent S.E.M. \*\*\*\*  $p < 0.0001$ ; \*\*\*  $p < 0.001$ ;  
640 ns, not significant; Kruskal–Wallis ANOVA with Dunn's multiple comparisons  
641 test. (C) N2 are strongly aroused by a 3% CO<sub>2</sub> stimulus, irrespective of whether  
642 they have been acclimated at 21% or 7% O<sub>2</sub>.  $n = 462$ – $518$  animals. \*\*\*\*  $p <$   
643  $0.0001$ ; Wilcoxon signed-rank test.

644

645 **Figure S3. ASK and ADL sensory neuron spikes respond to O<sub>2</sub>.**

646 (A) O<sub>2</sub>-evoked Ca<sup>2+</sup> responses in ASK do not differ between N2 and *npr-1*  
647 animals. (B) Quantification of data plotted in (A).  $n = 21$ – $24$  animals; Mann-  
648 Whitney *U* test. Blue shading indicates a shift from 7% to 21% O<sub>2</sub>. (C) ADL  
649 sensory neurons show robust responses to a 21% O<sub>2</sub> stimulus in *npr-1* but not  
650 in N2 animals. (D) Quantification of data shown in (C).  $n = 30$  animals each. \*\*\*\*  
651  $p < 0.0001$ ; Mann-Whitney *U* test. Note different Ca<sup>2+</sup> sensors were used to  
652 image ASK (YC3.60) and ADL (GCaMP6).

653

654 **Figure S4. The OCR-2 TRPV channel is required for ADL responses to**  
655 **pheromone C9 but not to 21% O<sub>2</sub>.**

656 (A) OCR-2 is not required for ADL responses to a 21% O<sub>2</sub> stimulus, although  
657 Ca<sup>2+</sup> appears to rise less sharply in mutants. (B) Quantification of data plotted in  
658 (A).  $n = 21$ – $22$  animals each; Mann-Whitney *U* test. Blue shading indicates a  
659 shift from 7% to 21% O<sub>2</sub>. (C) OCR-2 is required cell autonomously for ADL  
660 response to the C9 ascaroside. (D) Quantification of data shown in (C).  $n = 11$ –  
661  $12$  animals each. \*\*\*\*  $p < 0.0001$ ; Mann-Whitney *U* test. Grey shading indicates  
662 stimulation with 10 nM C9.

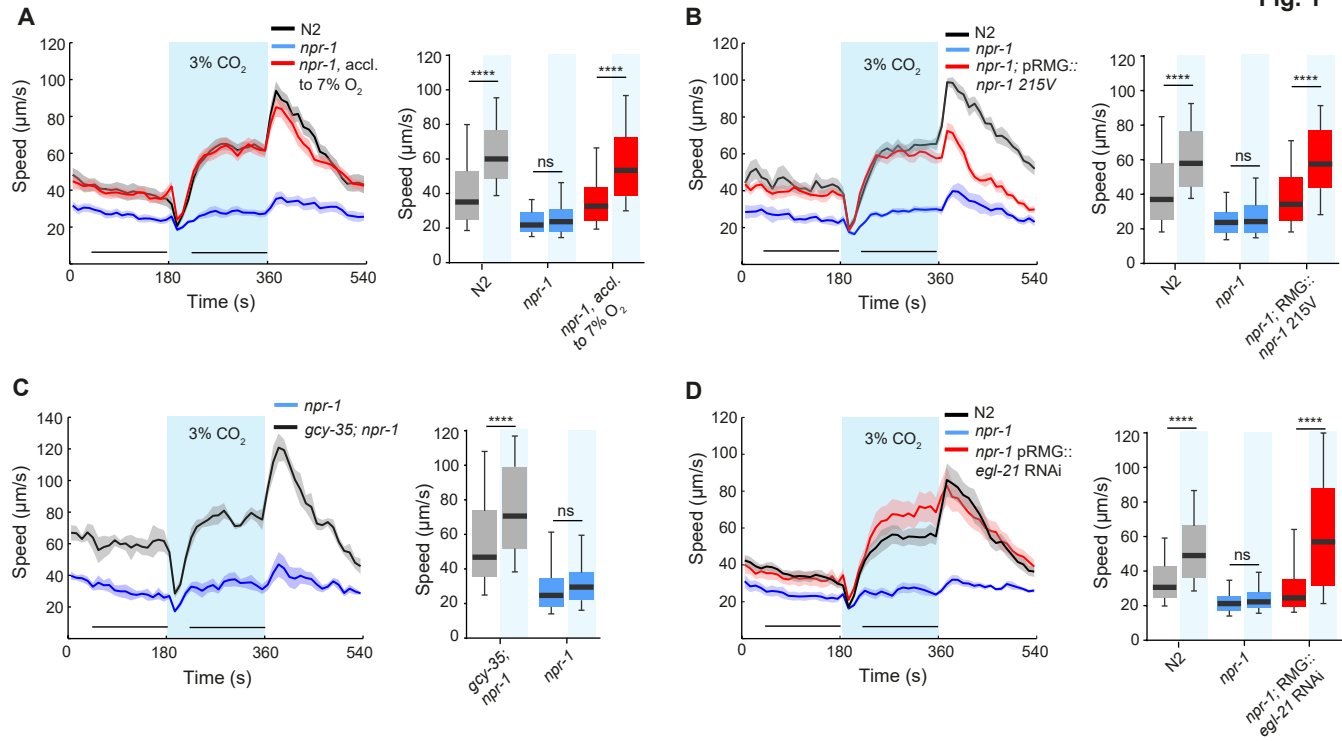



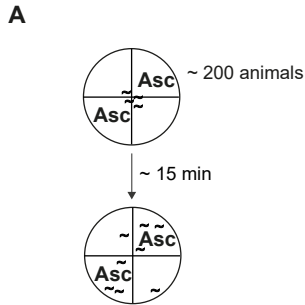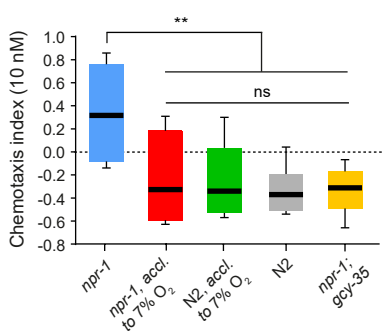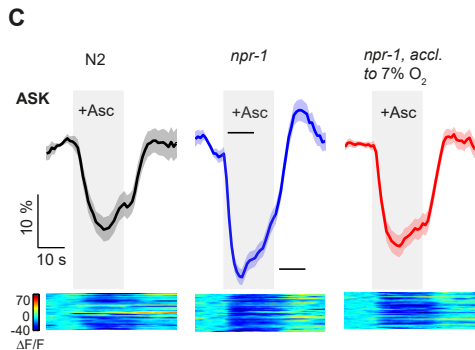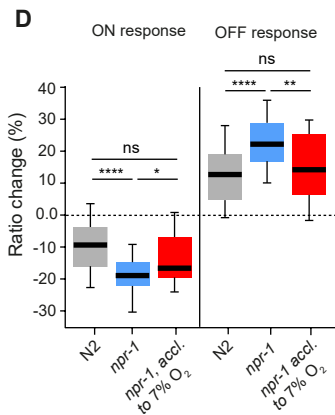

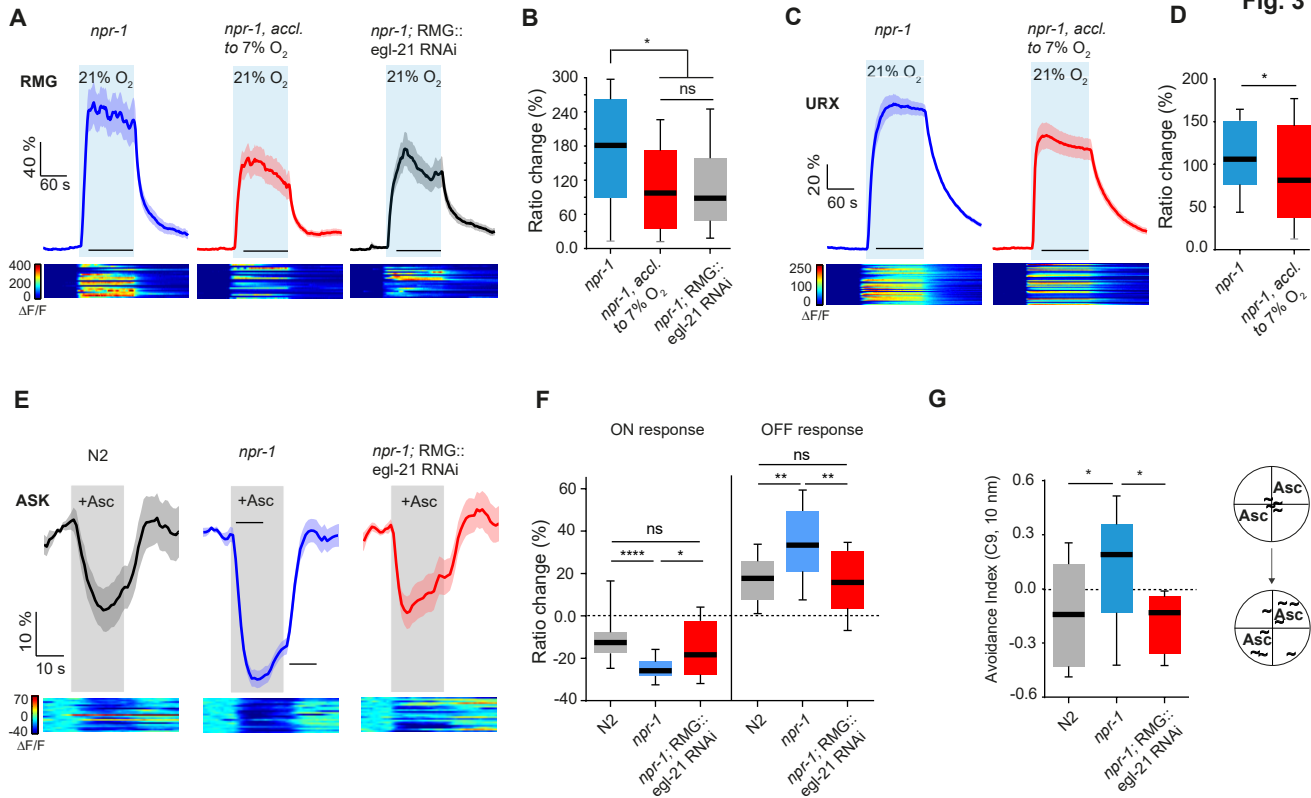

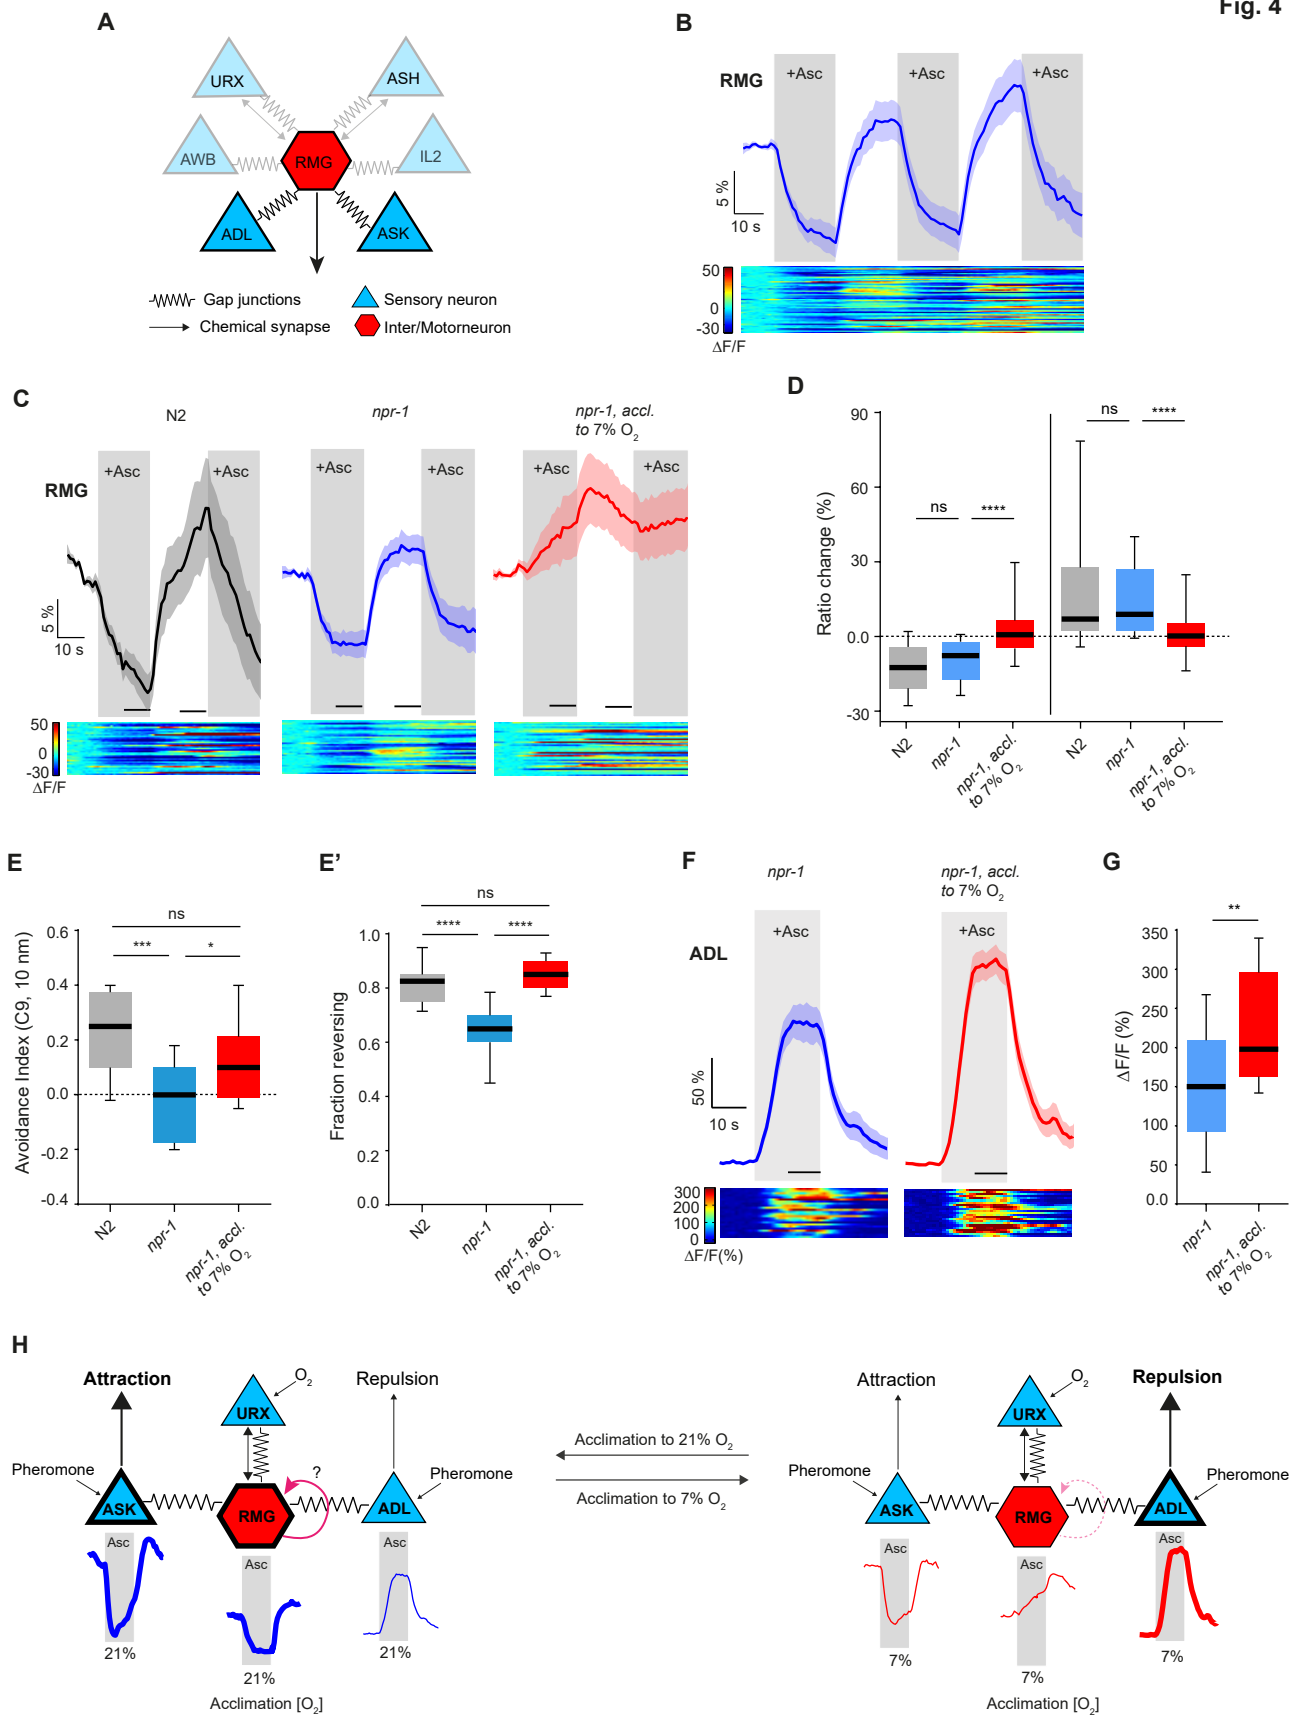

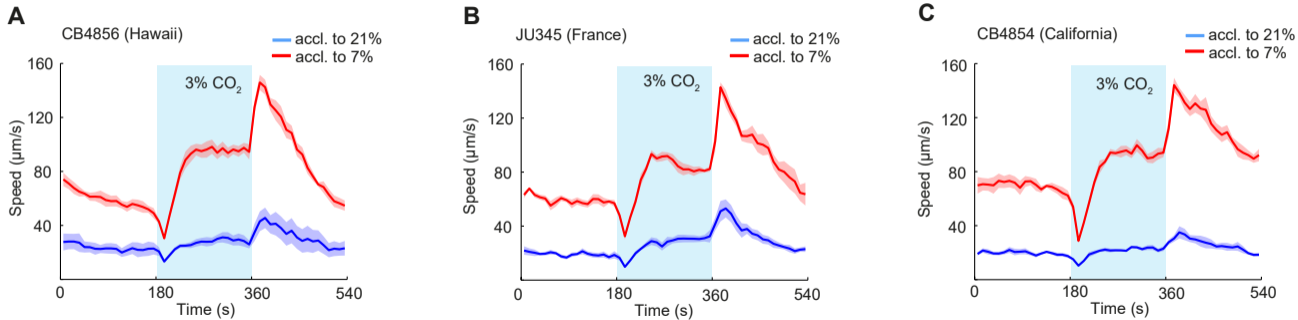

A

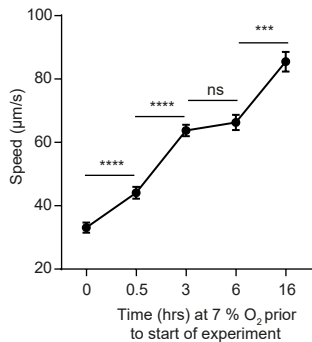

A'

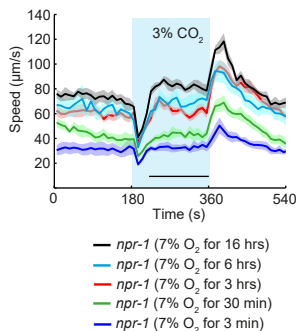

B

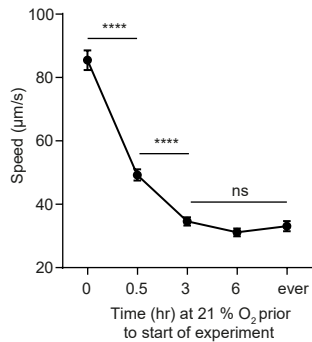

B'

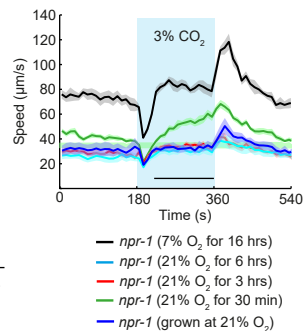

C

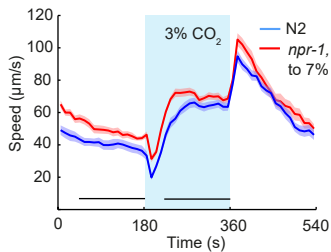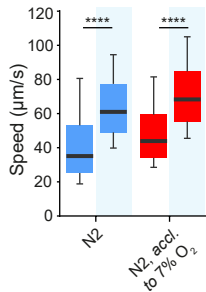

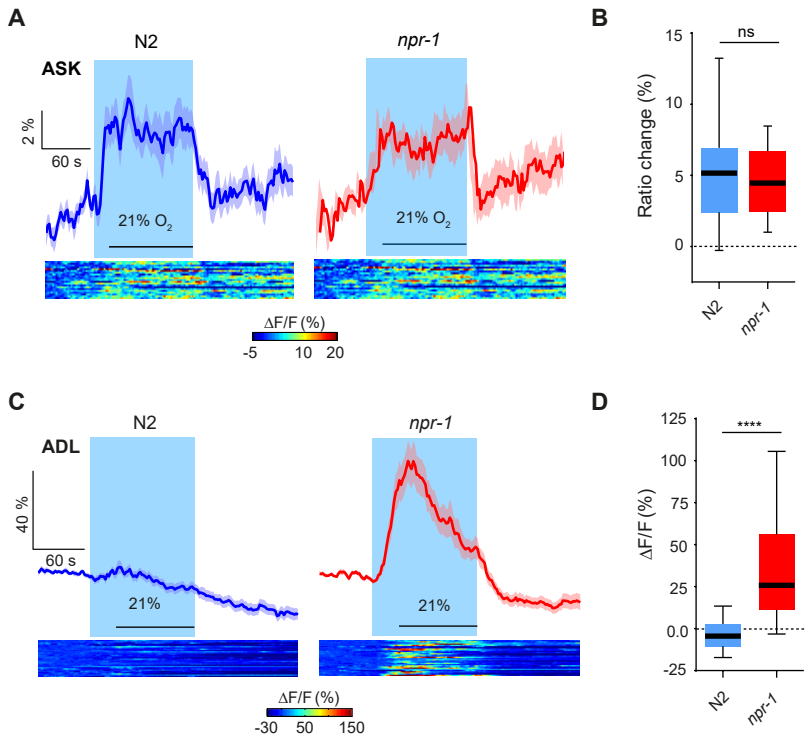

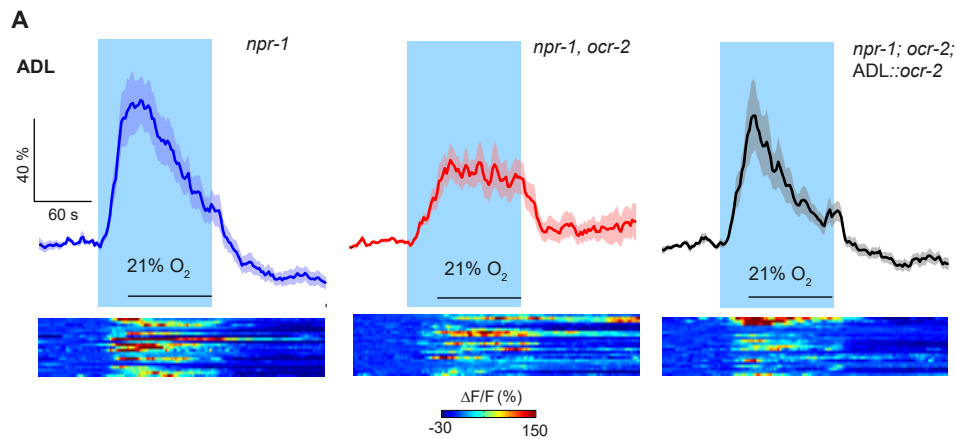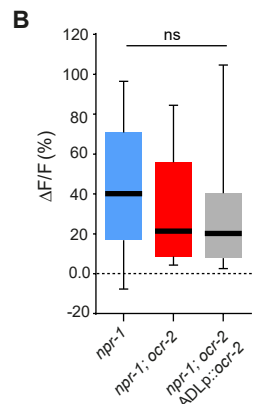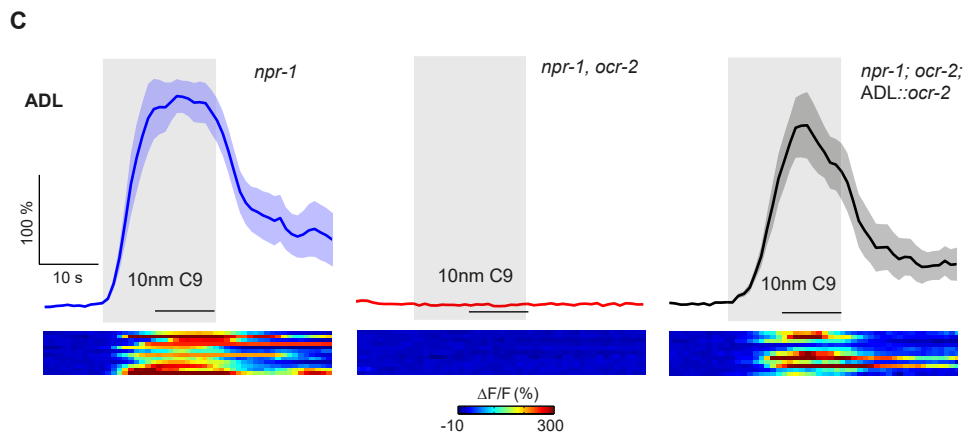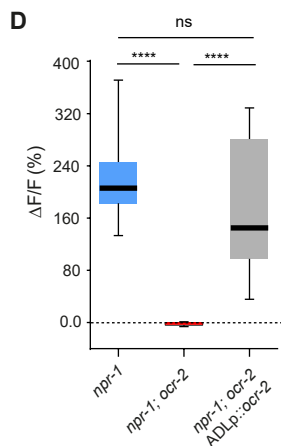

Source: https://www.biorxiv.org/content/10.1101/107524v1.full.pdf
